# Supplementary material for: The Generalizability of Randomized Controlled Trials of Self-Guided Internet-Based Cognitive Behavioral Therapy for Depressive Symptoms: Systematic Review and Meta-Regression Analysis
Source: PubMed Central journal article supplement (PMC6251981; doi:10.2196/10113), 2018-11-09
Supplement: jmir_v20i11e10113_app1.pdf [file jmir_v20i11e10113_app1.pdf]

**Appendix:**

- 1 - List of included studies
- 2 - Risk of bias assessment
- 3 - Example search terms

Studies identified by Karyotaki et al. 2017:

1. Berger T, Hammerli K, Gubser N, Andersson G, Caspar F. Internet-based treatment of depression: a randomized controlled trial comparing guided with unguided self-help. *Cognitive behaviour therapy*. 2011;40(4):251-266.
2. Christensen H, Griffiths KM, Jorm AF. Delivering interventions for depression by using the internet: randomised controlled trial. *BMJ (Clinical research ed)*. 2004;328(7434):265.
3. de Graaf LE, Gerhards S, Arntz A, et al. Clinical effectiveness of online computerised cognitive-behavioural therapy without support for depression in primary care: randomised trial. *The British Journal of Psychiatry*. 2009;195(1):73-80.
4. Farrer L, Christensen H, Griffiths KM, Mackinnon A. Internet-based CBT for depression with and without telephone tracking in a national helpline: randomised controlled trial. *PloS one*. 2011;6(11):e28099.
5. Gilbody S, Littlewood E, Hewitt C, et al. Computerised cognitive behaviour therapy (cCBT) as treatment for depression in primary care (REEACT trial): large scale pragmatic randomised controlled trial. *BMJ (Clinical research ed)*. 2015;351:h5627.
6. Kleiboer A, Donker T, Seekles W, van Straten A, Riper H, Cuijpers P. A randomized controlled trial on the role of support in internet-based problem solving therapy for depression and anxiety. *Behaviour research and therapy*. 2015;72(6):63-71.
7. Klein JP, Berger T, Schröder J, et al. Effects of a Psychological Internet Intervention in the Treatment of Mild to Moderate Depressive Symptoms: Results of the EVIDENT Study, a Randomized Controlled Trial. *Psychotherapy and psychosomatics*. 2016;85(4):218-228.
8. Meyer B, Berger T, Caspar F, Beevers CG, Andersson G, Weiss M. Effectiveness of a novel integrative online treatment for depression (Deprexis): randomized controlled trial. *Journal of medical Internet research*. 2009;11(2):e15.
9. Meyer B, Bierbrodt J, Schröder J, et al. Effects of an Internet intervention (Deprexis) on severe depression symptoms: Randomized controlled trial. *Internet Interventions*. 2015;2(1):48-59.
10. Moritz S, Schilling L, Hauschildt M, Schroder J, Treszl A. A randomized controlled trial of internet-based therapy in depression. *Behaviour research and therapy*. 2012;50(7-8):513-521.
11. Phillips R, Schneider J, Molosankwe I, et al. Randomized controlled trial of computerized cognitive behavioural therapy for depressive symptoms: effectiveness and costs of a workplace intervention. *Psychol Med*. 2014;44(4):741-752.
12. Spek V, Nyklíček I, Smits N, et al. Internet-based cognitive behavioural therapy for subthreshold depression in people over 50 years old: a randomized controlled clinical trial. *Psychological medicine*. 2007;37(12):1797-1806.
13. Clarke G, Reid E, Eubanks D, et al. Overcoming depression on the Internet (ODIN): a randomized controlled trial of an Internet depression skills intervention program. *Journal of medical Internet research*. 2002;4(3):e14.
14. Clarke G, Eubanks D, Reid CK, et al. Overcoming Depression on the Internet (ODIN)(2): a randomized trial of a self-help depression skills program with reminders. *Journal of medical Internet research*. . 2005;7(2):e16.
15. Clarke G, Kelleher C, Hornbrook M, DeBar L, Dickerson J, Gullion C. Randomized effectiveness trial of an Internet, pure self-help, cognitive behavioral intervention for depressive symptoms in young adults. *Cognitive behaviour therapy*. 2009;38(4):222-234.

16. Mira A, Bretón-López J, García-Palacios A, Quero S, Baños RM, Botella C. An internet-based program for depressive symptoms using human and automated support: a randomized control trial. *Neuropsychiatr Dis Treat*. In press.

New studies identified by systematic review:

17. Terides, M. D., Dear, B. F., Fogliati, V. J., Gandy, M., Karin, E., Jones, M. P., & Titov, N. (2018). Increased skills usage statistically mediates symptom reduction in self-guided internet-delivered cognitive-behavioural therapy for depression and anxiety: a randomised controlled trial. *Cognitive behaviour therapy*, 47(1), 43-61.
18. Montero-Marín, J., Araya, R., Pérez-Yus, M. C., Mayoral, F., Gili, M., Botella, C., ... & Nogueira-Arjona, R. (2016). An internet-based intervention for depression in primary Care in Spain: a randomized controlled trial. *Journal of medical Internet research*, 18(8).
19. Arean, P. A., Hallgren, K. A., Jordan, J. T., Gazzaley, A., Atkins, D. C., Heagerty, P. J., & Anguera, J. A. (2016). The use and effectiveness of mobile apps for depression: results from a fully remote clinical trial. *Journal of medical Internet research*, 18(12).
20. Beevers, C. G., Pearson, R., Hoffman, J. S., Foulser, A. A., Shumake, J., & Meyer, B. (2017). Effectiveness of an internet intervention (Deprexis) for depression in a United States adult sample: A parallel-group pragmatic randomized controlled trial. *Journal of consulting and clinical psychology*, 85(4), 367.
21. Berger, T., Krieger, T., Sude, K., Meyer, B., & Maercker, A. (2017). Evaluating an e-mental health program ("deprexis") as adjunctive treatment tool in psychotherapy for depression: Results of a pragmatic randomized controlled trial. *Journal of affective disorders*, 227, 455-462.

**Cochrane Risk of Bias Assessment:**

| Study            | Judgement | Support |
|------------------|-----------|---------|
| Arean et al 2016 |           |         |

| <b>Study</b>                                              | <b>Judgement</b> | <b>Support</b>                                                                                                                                                                                                                               |
|-----------------------------------------------------------|------------------|----------------------------------------------------------------------------------------------------------------------------------------------------------------------------------------------------------------------------------------------|
| Random sequence generation (selection bias)               | Low risk         | We randomly assigned participants to 1 of the 3 apps using a random number generator built into the eligibility survey.                                                                                                                      |
| Allocation concealment (selection bias)                   | Low risk         | Main article and protocol study do not directly reference allocation concealment but participants in this study were randomly assigned to treatment and this was a fully remote trial in which there was "minimal contact with study staff." |
| Blinding of participants and personnel (performance bias) | N/A              | It is not possible blind participants to treatment condition                                                                                                                                                                                 |
| Blinding of outcome assessment (detection bias)           | N/A              | (Self-reported outcome)                                                                                                                                                                                                                      |
| Incomplete outcome data (attrition bias)                  | Low risk         | Effect sizes computed from ITT analyses.                                                                                                                                                                                                     |
| Selective reporting (reporting bias)                      | Low risk         | No obvious deviations from published protocol.                                                                                                                                                                                               |
| Other bias                                                | Low risk         | A conflict of interest is reported in regards to one of the conditions the iCBT is being compared against. No obvious source of bias.                                                                                                        |
| <b>Montero-Marin et al 2016</b>                           |                  |                                                                                                                                                                                                                                              |
| Random sequence generation (selection bias)               | Low risk         | "Participants were individually randomized using blocked random number sequence. Randomization to one of the three groups. Blocks were administered in each of the regions, using a computer-generated random number sequence."              |
| Allocation concealment (selection bias)                   | Low risk         | "A person who had no other involvement in the study managed the random allocation to groups. This procedure was implemented through a remote central telephone line. The sequence was concealed until all individuals had been randomized."  |
| Blinding of participants and personnel (performance bias) | N/A              | It is not possible blind participants to treatment condition                                                                                                                                                                                 |
| Blinding of outcome assessment (detection bias)           | N/A              | (Self-reported outcome)                                                                                                                                                                                                                      |
| Incomplete outcome data (attrition bias)                  | Low risk         | Effect sizes computed from ITT analyses.                                                                                                                                                                                                     |
| Selective reporting (reporting bias)                      | Low risk         | No obvious deviations from published protocol.                                                                                                                                                                                               |
| Other bias                                                | Low risk         | No obvious source of bias.                                                                                                                                                                                                                   |
| <b>Berger et al. 2018</b>                                 |                  |                                                                                                                                                                                                                                              |
| Random sequence generation (selection bias)               | Low risk         | "automated computer generated random numbers"                                                                                                                                                                                                |
| Allocation concealment (selection bias)                   | Low risk         | "table placed in a secured web-based database and was concealed to the investigators and the therapists."                                                                                                                                    |
| Blinding of participants and personnel                    | N/A              | It is not possible blind participants to treatment condition                                                                                                                                                                                 |

| <b>Study</b>                                              | <b>Judgement</b> | <b>Support</b>                                                                                                                                                                                             |
|-----------------------------------------------------------|------------------|------------------------------------------------------------------------------------------------------------------------------------------------------------------------------------------------------------|
| (performance bias)                                        |                  |                                                                                                                                                                                                            |
| Blinding of outcome assessment (detection bias)           | N/A              | (Self-reported outcome)                                                                                                                                                                                    |
| Incomplete outcome data (attrition bias)                  | Low risk         | Effect sizes computed from ITT analyses.                                                                                                                                                                   |
| Selective reporting (reporting bias)                      | Low risk         | Due to recruitment problems and resource limitations, were unable to recruit number of participants originally proposed. Study sufficiently powered to detect a medium-sized effect of intervention.       |
| Other bias                                                | Low risk         | Study co-author employed by company who owns iCBT intervention. No obvious source of bias.                                                                                                                 |
| <b>Beevers et al. 2017</b>                                |                  |                                                                                                                                                                                                            |
| Random sequence generation (selection bias)               | Low risk         | "Randomization was conducted with an allocation schedule of random numbers that was created by a computerized random number generator."                                                                    |
| Allocation concealment (selection bias)                   | Low risk         | "Participants who were deemed eligible were placed on this list by a research assistant (J.H.) who did not conduct telephone interviews."                                                                  |
| Blinding of participants and personnel (performance bias) | N/A              | It is not possible blind participants to treatment condition                                                                                                                                               |
| Blinding of outcome assessment (detection bias)           | N/A              | (Self-reported outcome)                                                                                                                                                                                    |
| Incomplete outcome data (attrition bias)                  | Low risk         | Effect sizes computed from ITT analyses.                                                                                                                                                                   |
| Selective reporting (reporting bias)                      | Low risk         | No obvious source of bias.                                                                                                                                                                                 |
| Other bias                                                | Low risk         | Study co-author employed by company who owns iCBT intervention. No obvious source of bias.                                                                                                                 |
| <b>Terides et al., 2017</b>                               |                  |                                                                                                                                                                                                            |
| Random sequence generation (selection bias)               | Low risk         | "A permuted block randomisation sequence was used, utilising blocks of eight (four treatment group, four control group), through the website <a href="http://www.randomizer.org">www.randomizer.org</a> ." |
| Allocation concealment (selection bias)                   | Low risk         | "...both the experimenter and the applicants were blinded to this allocation [sequence]"                                                                                                                   |
| Blinding of participants and personnel (performance bias) | N/A              | It is not possible blind participants to treatment condition                                                                                                                                               |
| Blinding of outcome assessment (detection bias)           | N/A              | (Self-reported outcome)                                                                                                                                                                                    |
| Incomplete outcome data (attrition bias)                  | Low risk         | Effect sizes computed from ITT analyses.                                                                                                                                                                   |
| Selective reporting (reporting bias)                      | Low risk         | No obvious source of bias.                                                                                                                                                                                 |

| Study      | Judgement | Support                    |
|------------|-----------|----------------------------|
| Other bias | Low risk  | No obvious source of bias. |

### Example search terms for Pubmed:

(Internet [All Fields] OR web [All Fields] OR "internet-based" [All Fields] or "web-based" [All Fields] AND Psychotherapy [MH] OR psychotherap\*[All Fields] OR cbt[All Fields] OR "behavior therapies"[All Fields] OR "behavior therapy"[All Fields] OR "behavior therapeutic"[All Fields] OR "behavior therapeutical"[All Fields] OR "behavior therapeutics"[All Fields] OR "behavior therapist"[all Fields] OR "behavior therapists"[All Fields] OR "behavior treatment"[All Fields] OR "behavior treatments"[All Fields] OR "behaviors therapies"[All Fields] OR "behaviors therapy"[All Fields] OR "behaviors therapeutics"[All Fields] OR "behaviors therapeutic"[All Fields] OR "behaviors therapeutical"[All Fields] OR "behaviors therapist"[All Fields] OR "behaviors therapists"[All Fields] OR "behaviors treatment"[All Fields] OR "behaviors treatments"[All Fields] OR "behavioral therapies"[All Fields] OR "behavioral therapy"[All Fields] OR "behavioral therapeutics"[All Fields] OR "behavioral therapeutic"[All Fields] OR "behavioral therapeutical"[All Fields] OR "behavioral therapist"[All Fields] OR "behavioral therapists"[All Fields] OR "behavioral treatment"[All Fields] OR "behavioral treatments"[All Fields] OR "behaviour therapies"[All Fields] OR "behaviour therapy"[All Fields] OR "behaviour therapeutic"[All Fields] OR "behaviour therapeutical"[All Fields] OR "behaviour therapeutics"[All Fields] OR "behaviour therapist"[all Fields] OR "behaviour therapists"[All Fields] OR "behaviour treatment"[All Fields] OR "behaviour treatments"[All Fields] OR "behaviours therapies"[All Fields] OR "behaviours therapy"[All Fields] OR "behaviours therapeutics"[All Fields] OR "behaviours therapeutic"[All Fields] OR "behaviours therapeutical"[All Fields] OR "behaviours therapist"[All Fields] OR "behaviours therapists"[All Fields] OR "behaviours treatment"[All Fields] OR "behaviours treatments"[All Fields] OR "behavioural therapies"[All Fields] OR "behavioural therapy"[All Fields] OR "behavioural therapeutics"[All Fields] OR "behavioural therapeutic"[All Fields] OR "behavioural therapeutical"[All Fields] OR "behavioural therapist"[All Fields] OR "behavioural therapists"[All Fields] OR "behavioural treatment"[All Fields] OR "behavioural treatments"[All Fields] OR "cognition therapies"[All Fields] OR "cognition therapie"[All Fields] OR "cognition therapy"[All Fields] OR "cognition therapeutical"[All Fields] OR "cognition therapeutic"[All Fields] OR "cognition therapeutics"[All Fields] OR "cognition therapist"[All Fields] OR "cognition therapists"[All Fields] OR "cognition treatment"[All Fields] OR "cognition treatments"[All Fields] OR psychodynamic[All Fields] OR Psychoanalysis[MH] OR psychoanalysis[All Fields] OR psychoanalytic\*[All Fields] OR counselling[All Fields] OR counseling[All Fields] OR Counseling[MH] OR "problem-solving"[All Fields] OR mindfulness[All Fields] OR (acceptance[All Fields] AND commitment[All Fields] ) OR "assertiveness training"[All Fields] OR "behavior activation"[All Fields] OR "behaviors activation"[All Fields] OR "behavioral activation"[All Fields] OR "cognitive therapies"[All Fields] OR "cognitive therapy"[All Fields] OR "cognitive therapeutic"[All Fields] OR "cognitive therapeutics"[All Fields] OR "cognitive therapeutical"[All Fields] OR "cognitive therapist"[All Fields] OR "cognitive therapists"[All Fields] OR "cognitive treatment"[All Fields] OR "cognitive treatments"[All Fields] OR "cognitive restructuring"[All Fields] OR (("compassion-focused"[All Fields] OR "compassion-focussed"[All Fields])) AND (therapy[SH] OR therapies[All Fields] OR therapy[All Fields] OR therape\*[All Fields] OR therapis\*[All Fields]OR Therapeutics [OR treatment\*[All Fields])) OR ((therapy[SH] OR therapies[All Fields] OR therapy [All Fields] OR therape\*[All Fields] OR therapis\*[All Fields] OR Therapeutics[MH] OR treatment\*[All Fields]) AND constructivist\*[All Fields]) OR "metacognitive therapies"[All Fields] OR "metacognitive therapy"[All Fields] OR "metacognitive therapeutic"[All Fields] OR "metacognitive therapeutics"[All Fields] OR "metacognitive therapeutical"[All Fields] OR "metacognitive therapist"[All Fields] OR "metacognitive therapists"[All Fields] OR "metacognitive treatment"[All Fields] OR



"metacognitive treatments"[All Fields] OR "meta-cognitive therapies"[All Fields] OR "meta-cognitive therapy"[All Fields] OR "meta-cognitive therapeutic"[All Fields] OR "meta-cognitive therapeutics"[All Fields] OR "meta-cognitive therapeutical"[All Fields] OR "meta-cognitive therapist"[All Fields] OR "meta-cognitive therapists"[All Fields] OR "meta-cognitive treatment"[All Fields] OR "meta-cognitive treatments"[All Fields] OR "solution-focused therapies"[All Fields] OR "solution-focused therapy"[All Fields] OR "solution-focused therapeutic"[All Fields] OR "solution-focused therapeutics"[All Fields] OR "solution-focused therapeutical"[All Fields] OR "solution focused therapies"[All Fields] OR "solution focused therapy"[All Fields] OR "solution focused therapeutic"[All Fields] OR "solution focused therapeutics"[All Fields] OR "solution focused therapeutical"[All Fields] OR "solution-focussed therapies"[All Fields] OR "solution-focussed therapy"[All Fields] OR "solution-focussed therapeutic"[All Fields] OR "solution-focussed therapeutics"[All Fields] OR "solution-focussed therapeutical"[All Fields] OR "solution focussed therapies"[All Fields] OR "solution focussed therapy"[All Fields] OR "solution focussed therapeutic"[All Fields] OR "solution focussed therapeutics"[All Fields] OR "solution focussed therapeutical"[All Fields] OR "self-control therapies"[All Fields] OR "self-control therapy"[All Fields] OR "self-control therapeutics"[All Fields] OR "self-control therapeutical"[All Fields] OR "self-control therapeutic"[All Fields] OR "self-control training"[All Fields] OR "self-control trainings"[All Fields] OR "self control therapies"[All Fields] OR "self control therapy"[All Fields] OR "self control therapeutics"[All Fields] OR "self control therapeutical"[All Fields] OR "self control therapeutic"[All Fields] OR "self control training"[All Fields] OR "self control trainings"[All Fields] AND (Depressive Disorder[MH] OR Depression[MH] OR dysthymi\*[All Fields] OR "affective disorder"[All Fields] OR "affective disorders"[All Fields] OR "mood disorder"[All Fields] OR "mood disorders"[All Fields] OR depression\*[All Fields] OR depressive\*[All Fields] OR "dysthymic disorder"[MeSH Terms]) AND ((randomized controlled trial [pt] OR controlled clinical trial [pt] OR randomized [tiab] OR randomly [tiab] NOT (animals[mh] NOT (animals[mh] AND humans [mh])))
